# Supplementary material
Source: PubMed Central journal article supplement (PMC4580491)
Supplement: NIHMS668675-supplement-supplement_1.pdf [file NIHMS668675-supplement-supplement_1.pdf]

## 458 Supplementary Tables

| Gene      | Atopic Dermatitis |                 | Non-lesional Pso |                 | Gene Description                                                            |
|-----------|-------------------|-----------------|------------------|-----------------|-----------------------------------------------------------------------------|
|           | Fold change       | P-Value         | Fold change      | P-Value         |                                                                             |
| APOBEC3A  | <b>0.18</b>       | <b>1.20E-02</b> | 1.07             | 7.33E-02        | apolipoprotein B mRNA editing enzyme, catalytic polypeptide-like 3A         |
| APOBEC3B  | 0.62              | 5.04E-01        | 1.17             | 8.24E-02        | apolipoprotein B mRNA editing enzyme, catalytic polypeptide-like 3B         |
| APOBEC3C  | 0.96              | 9.38E-01        | 1.05             | 2.06E-01        | apolipoprotein B mRNA editing enzyme, catalytic polypeptide-like 3C         |
| APOBEC3D  | NA                | NA              | 1.03             | 2.91E-01        | apolipoprotein B mRNA editing enzyme, catalytic polypeptide-like 3D         |
| APOBEC3F  | 1.09              | 9.45E-01        | 1.06             | 6.17E-02        | apolipoprotein B mRNA editing enzyme, catalytic polypeptide-like 3F         |
| APOBEC3G  | 0.44              | 3.01E-01        | 0.99             | 8.84E-01        | apolipoprotein B mRNA editing enzyme, catalytic polypeptide-like 3G         |
| APOBEC3H  | NA                | NA              | NA               | NA              | apolipoprotein B mRNA editing enzyme, catalytic polypeptide-like 3H         |
| BRD4      | 1.31              | 1.22E-01        | 1.05             | 8.15E-02        | bromodomain containing 4                                                    |
| BST2      | 0.67              | 7.42E-01        | 1.02             | 6.79E-01        | bone marrow stromal cell antigen 2                                          |
| CD74      | 0.68              | 2.68E-01        | <b>0.76</b>      | <b>5.12E-03</b> | CD74 molecule, major histocompatibility complex, class II invariant         |
| CDKN1A    | 0.74              | 2.16E-01        | 1.00             | 9.76E-01        | cyclin-dependent kinase inhibitor 1A (p21, Cip1)                            |
| CH25H     | <b>0.39</b>       | <b>1.67E-02</b> | 0.93             | 2.86E-01        | cholesterol 25-hydroxylase                                                  |
| CNP       | 1.00              | 9.89E-01        | 0.98             | 6.41E-01        | 2',3'-cyclic nucleotide 3' phosphodiesterase                                |
| CTR9      | 0.80              | 2.99E-01        | 1.00             | 9.92E-01        | Ctr9, Paf1/RNA polymerase II complex component, homolog                     |
| EIF2AK2   | 0.84              | 5.05E-01        | <b>0.92</b>      | <b>3.02E-02</b> | eukaryotic translation initiation factor 2-alpha kinase 2                   |
| HERC5     | 0.78              | 4.91E-01        | <b>0.88</b>      | <b>1.13E-02</b> | HECT and RLD domain containing E3 ubiquitin protein ligase 5                |
| IFITM1    | <b>0.61</b>       | <b>2.12E-02</b> | 0.98             | 6.68E-01        | interferon induced transmembrane protein 1                                  |
| IFITM2    | 0.68              | 2.43E-01        | 0.98             | 6.25E-01        | interferon induced transmembrane protein 2                                  |
| IFITM3    | 0.58              | 7.47E-02        | 0.96             | 3.21E-01        | interferon induced transmembrane protein 3                                  |
| IRF1      | 0.87              | 6.29E-01        | 0.95             | 5.35E-01        | interferon regulatory factor 1                                              |
| IRF7      | <b>0.43</b>       | <b>5.93E-03</b> | 1.10             | 7.70E-02        | interferon regulatory factor 7                                              |
| ISG15     | <b>0.42</b>       | <b>1.74E-02</b> | 1.00             | 9.66E-01        | ISG15 ubiquitin-like modifier                                               |
| LGALS3BP  | <b>0.51</b>       | <b>1.37E-02</b> | 0.95             | 4.46E-01        | lectin, galactoside-binding, soluble, 3 binding protein                     |
| MOV10     | NA                | NA              | 0.98             | 6.95E-01        | Mov10, Moloney leukemia virus 10, homolog (mouse)                           |
| MX2       | 0.62              | 7.23E-02        | 0.89             | 6.49E-02        | myxovirus (influenza virus) resistance 2 (mouse)                            |
| PAF1      | 0.79              | 5.39E-01        | 0.99             | 8.90E-01        | Paf1, RNA polymerase II associated factor, homolog ( <i>S. cerevisiae</i> ) |
| PML       | 0.55              | 2.16E-01        | 0.94             | 1.14E-01        | promyelocytic leukemia                                                      |
| RNASEL    | 0.68              | 5.25E-01        | 0.98             | 6.23E-01        | ribonuclease L (2',5'-oligoadenylate synthetase-dependent)                  |
| RSAD2     | 0.94              | 9.61E-01        | 0.94             | 4.11E-01        | radical S-adenosyl methionine domain containing 2                           |
| RTF1      | 1.17              | 3.38E-01        | 1.02             | 6.16E-01        | Rtf1, Paf1/RNA polymerase II complex component, homolog                     |
| SAMHD1    | 0.46              | 2.09E-01        | 1.02             | 6.90E-01        | SAM domain and HD domain 1                                                  |
| SLFN11    | NA                | NA              | <b>0.83</b>      | <b>9.25E-03</b> | schlafen family member 11                                                   |
| SUN2      | 1.15              | 5.21E-01        | 1.05             | 6.11E-02        | Sad1 and UNC84 domain containing 2                                          |
| TNFRSF10A | NA                | NA              | 1.08             | 1.17E-01        | tumor necrosis factor receptor superfamily, member 10a                      |
| TRIM11    | NA                | NA              | 0.95             | 1.46E-01        | tripartite motif containing 11                                              |
| TRIM14    | 0.61              | 9.05E-02        | 1.04             | 5.58E-01        | tripartite motif containing 14                                              |
| TRIM21    | 0.91              | 7.58E-01        | <b>0.92</b>      | <b>1.46E-02</b> | tripartite motif containing 21                                              |

|        |      |          |      |          |                                |
|--------|------|----------|------|----------|--------------------------------|
| TRIM22 | 0.71 | 1.78E-01 | 0.98 | 7.53E-01 | tripartite motif containing 22 |
| TRIM26 | 0.90 | 7.25E-01 | 1.02 | 5.98E-01 | tripartite motif containing 26 |
| TRIM28 | 0.79 | 2.75E-01 | 0.92 | 7.62E-02 | tripartite motif containing 28 |
| TRIM32 | 0.87 | 4.31E-01 | 0.91 | 7.84E-02 | tripartite motif containing 32 |
| TRIM5  | 1.02 | 9.84E-01 | 0.98 | 7.55E-01 | tripartite motif containing 5  |

459

460 **Supplementary Table 1. Antiviral restriction factor expression in atopic dermatitis**461 **and non-lesional psoriasis skin.** The expression levels of antiviral restriction factors

462 were measured in atopic dermatitis vs healthy skin (Affymetrix HG-U133A microarray)

463 and non-lesional psoriasis skin vs healthy skin (Affymetrix HU133 Plus 2.0 Microarray).

464 In instances in which more than one microarray probe is present per gene, data from

465 median p-value probe is displayed.

466

467

| Gene      | Quantitative Real-Time PCR |          |
|-----------|----------------------------|----------|
|           | Fold change                | P-value  |
| APOBEC3A  | 0.79                       | 1.64E-01 |
| APOBEC3B  | 0.84                       | 8.16E-01 |
| APOBEC3C  | 0.99                       | 9.17E-01 |
| APOBEC3D  | 1.00                       | 9.04E-01 |
| APOBEC3F  | 0.82                       | 9.68E-01 |
| APOBEC3G  | 1.03                       | 8.79E-01 |
| APOBEC3H  | 1.10                       | 9.55E-01 |
| BRD4      | 1.01                       | 6.18E-01 |
| BST2      | 1.01                       | 3.47E-01 |
| CD74      | 1.04                       | 9.42E-01 |
| CDKN1A    | 1.08                       | 5.90E-01 |
| CH25H     | 1.11                       | 7.28E-01 |
| CNP       | 1.05                       | 3.07E-01 |
| CTR9      | 1.09                       | 3.31E-01 |
| EIF2AK2   | 0.86                       | 5.05E-01 |
| HERC5     | 0.83                       | 7.91E-01 |
| IFITM1    | 0.86                       | 1.64E-01 |
| IFITM2    | 0.97                       | 9.55E-01 |
| IFITM3    | 0.86                       | 5.47E-01 |
| IRF1      | 0.95                       | 5.47E-01 |
| IRF7      | 0.80                       | 2.81E-01 |
| ISG15     | 1.05                       | 4.17E-01 |
| LGALS3BP  | 0.71                       | 2.31E-01 |
| MOV10     | 0.86                       | 1.55E-01 |
| MX2       | 0.86                       | 4.45E-01 |
| PAF1      | 1.05                       | 5.36E-01 |
| PML       | 0.93                       | 9.87E-01 |
| RNASEL    | 0.98                       | 9.10E-01 |
| RSAD2     | 0.64                       | 9.55E-01 |
| RTF1      | 1.08                       | 8.83E-02 |
| SAMHD1    | 1.09                       | 3.23E-01 |
| SLFN11    | 1.09                       | 5.41E-01 |
| SUN2      | 0.89                       | 8.24E-02 |
| TNFRSF10A | 0.99                       | 8.91E-01 |
| TRIM11    | 0.94                       | 5.47E-01 |
| TRIM14    | 0.94                       | 7.54E-01 |
| TRIM21    | 0.98                       | 6.35E-01 |

|        |      |          |
|--------|------|----------|
| TRIM22 | 0.88 | 6.13E-01 |
| TRIM26 | 0.99 | 6.35E-01 |
| TRIM28 | 1.00 | 9.36E-01 |
| TRIM32 | 0.81 | 1.17E-01 |
| TRIM5  | 0.94 | 9.17E-01 |

469  
470 **Supplementary Table 2. Antiviral restriction factor expression in psoriatic versus**  
471 **healthy PBMC.** The expression levels of antiviral restriction factors were measured in  
472 psoriatic (N=32) and healthy control PBMC (N=25) using quantitative real-time PCR.  
473 Fold change refers expression level in PBMC from psoriatic patients relative to healthy  
474 control PBMC. Statistical significance was evaluated using Mann-Whitney tests.  
475  
476

477 **Supplementary Figures**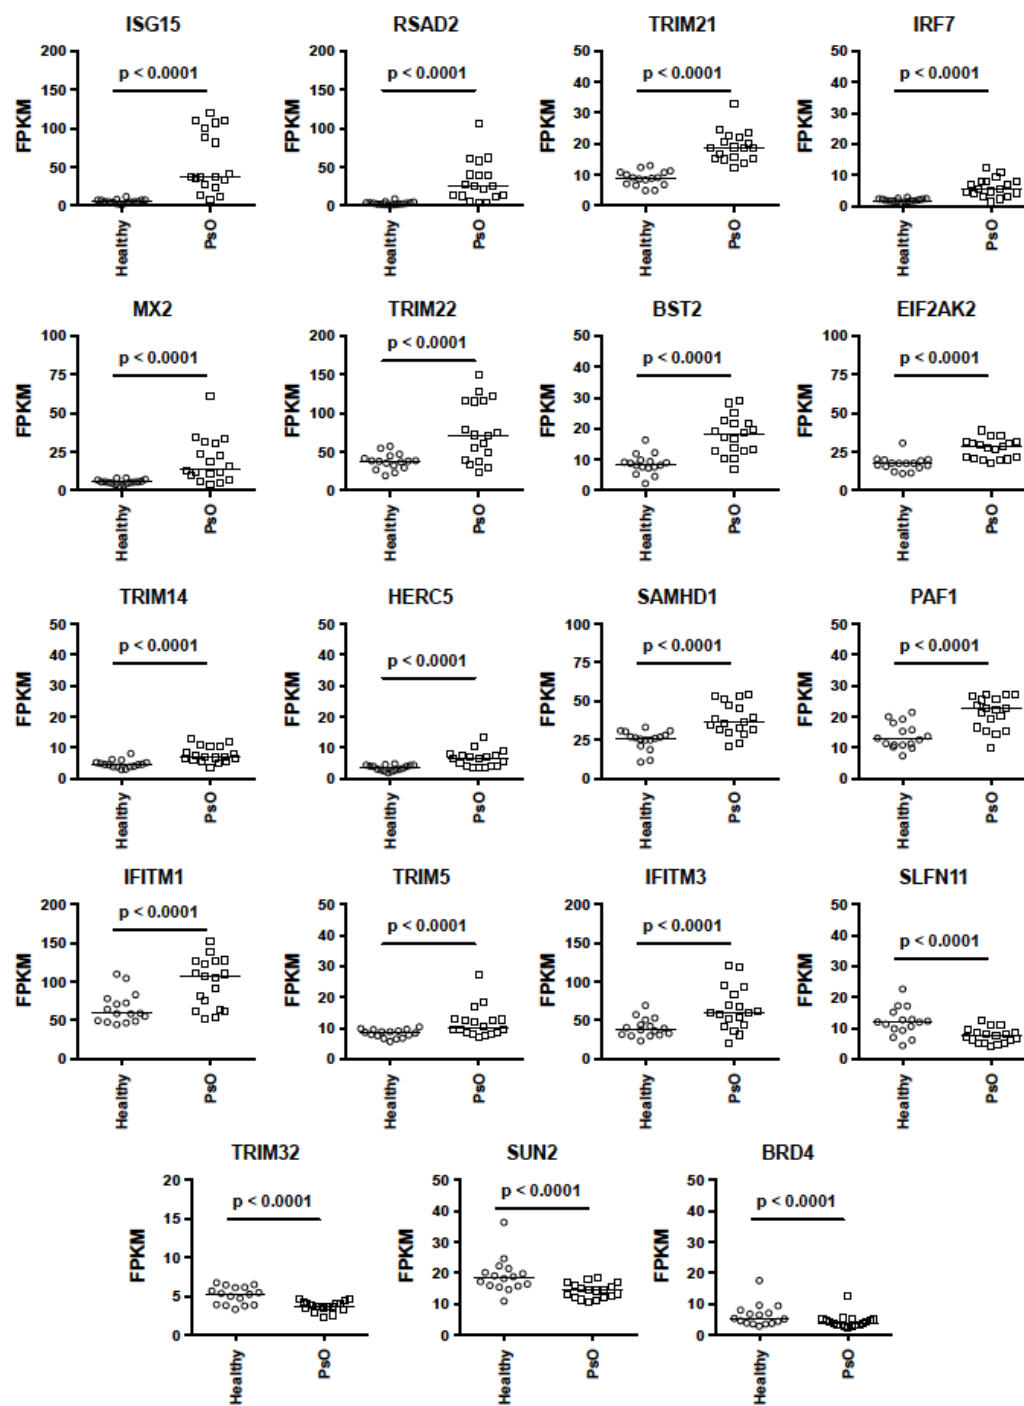

478

479 **Supplementary Figure 1.** Gene expression of antiviral genes (measured in FPKM,  
 480 fragments per kilobase of exon per million fragments mapped) in skin of healthy controls  
 481 and lesional skin of subjects with psoriasis.

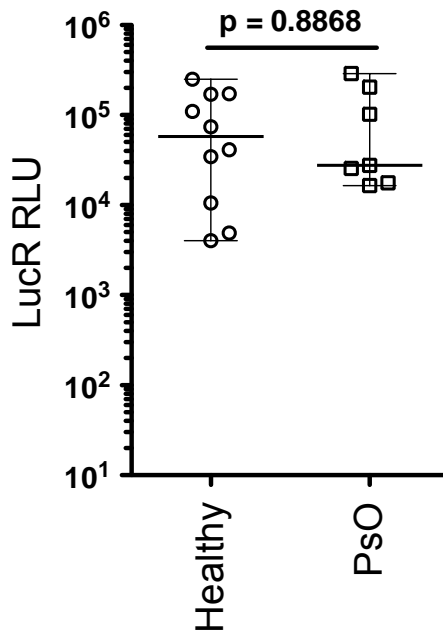

482

483 **Supplementary Figure 2.** *Ex vivo* HIV-1 infectivity in CD4+ T cells from healthy (N=10)

484 and psoriatic (PsO) patients (N=7). Purified CD4+ T cells were infected with HIV-1 Bal

485 with Tat-regulated Renilla luciferase for 7 days. Renilla Luciferase (LucR) activity was

486 measured and relative light units (RLU) is reported as median +/- range. Statistical

487 analysis was evaluated using Mann-Whitney test.

488
